# Supplementary material
Source: MDPI journal article supplement (https://www.mdpi.com/2305-6290/8/2/49)
Supplement: s1 [file s1 › logistics-2856683-supplementary.pdf]

## Supplementary materials

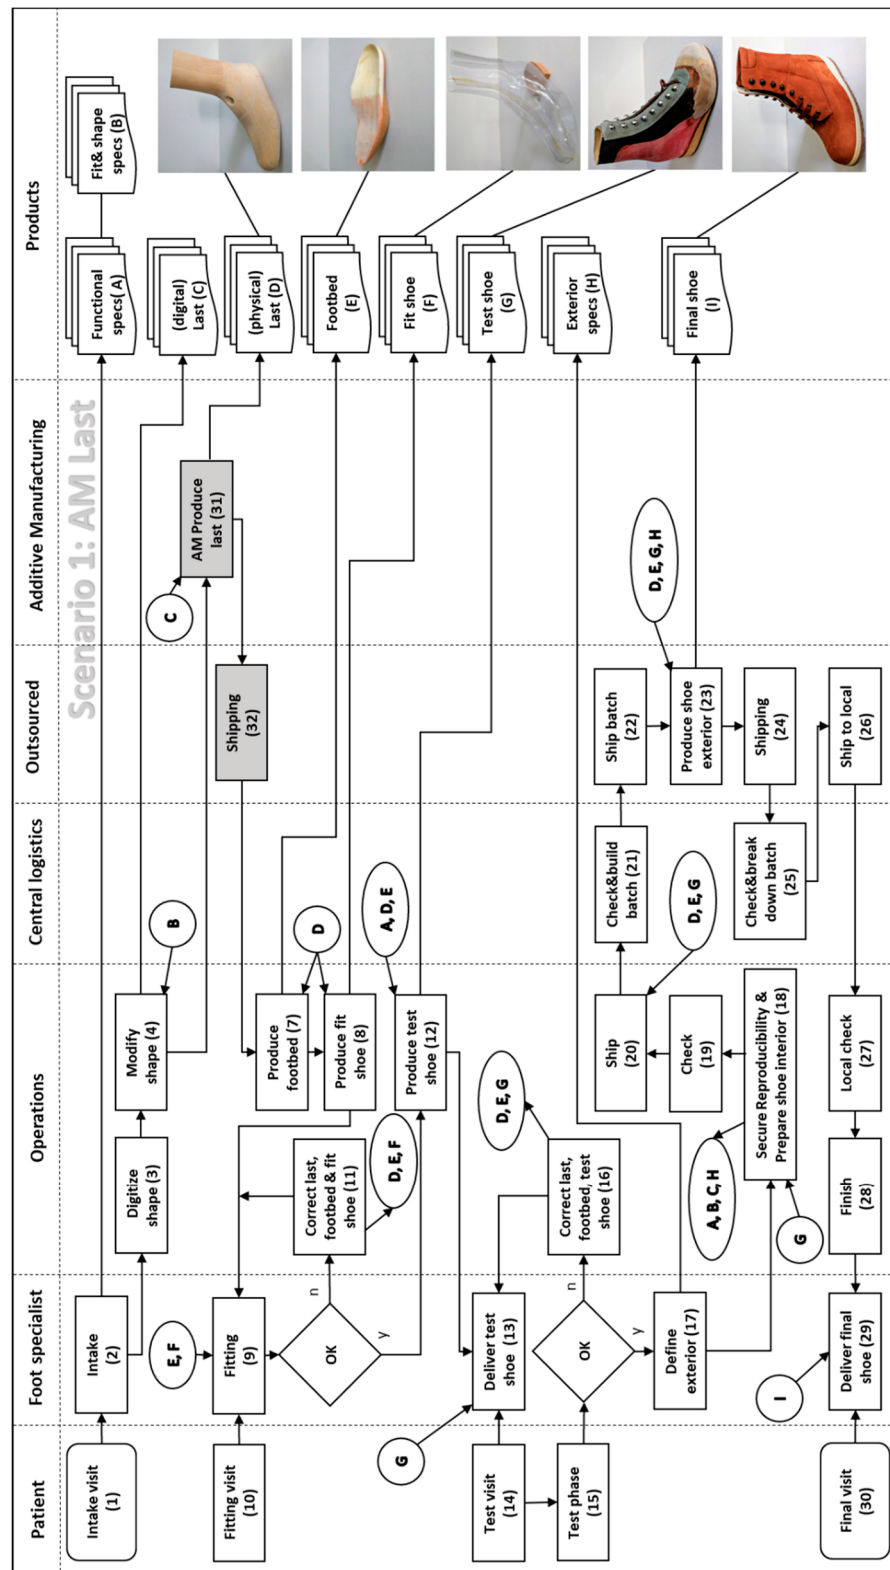

Figure S1. Process flow Scenario 1. AM of the last.

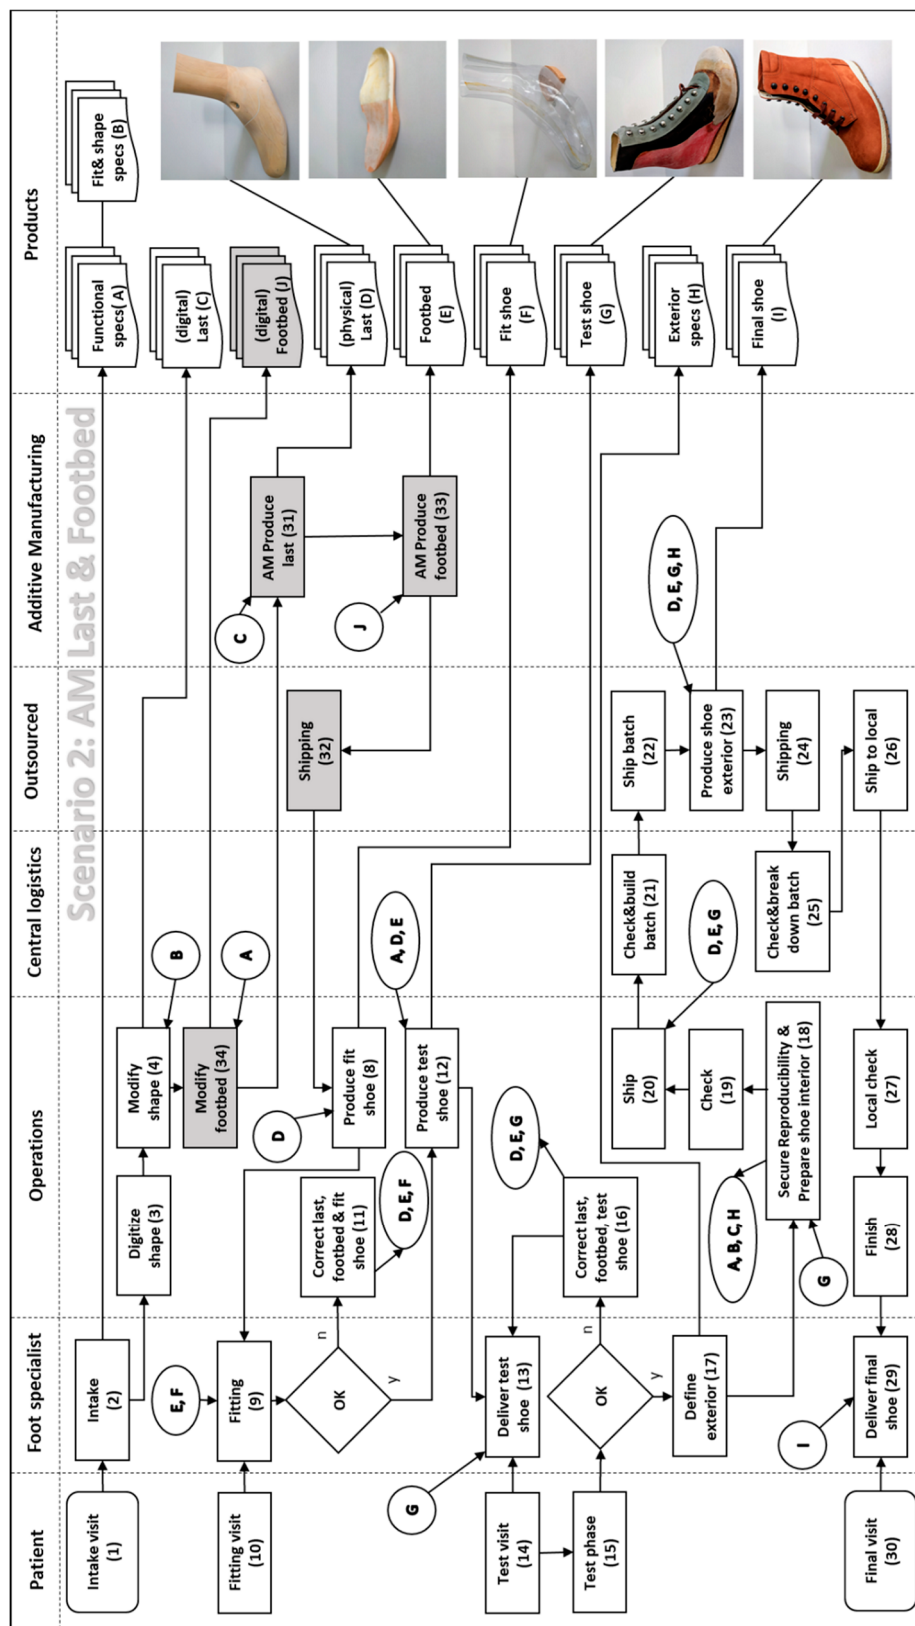

Figure S2. Process flow Scenario 2. AM of the footbed.

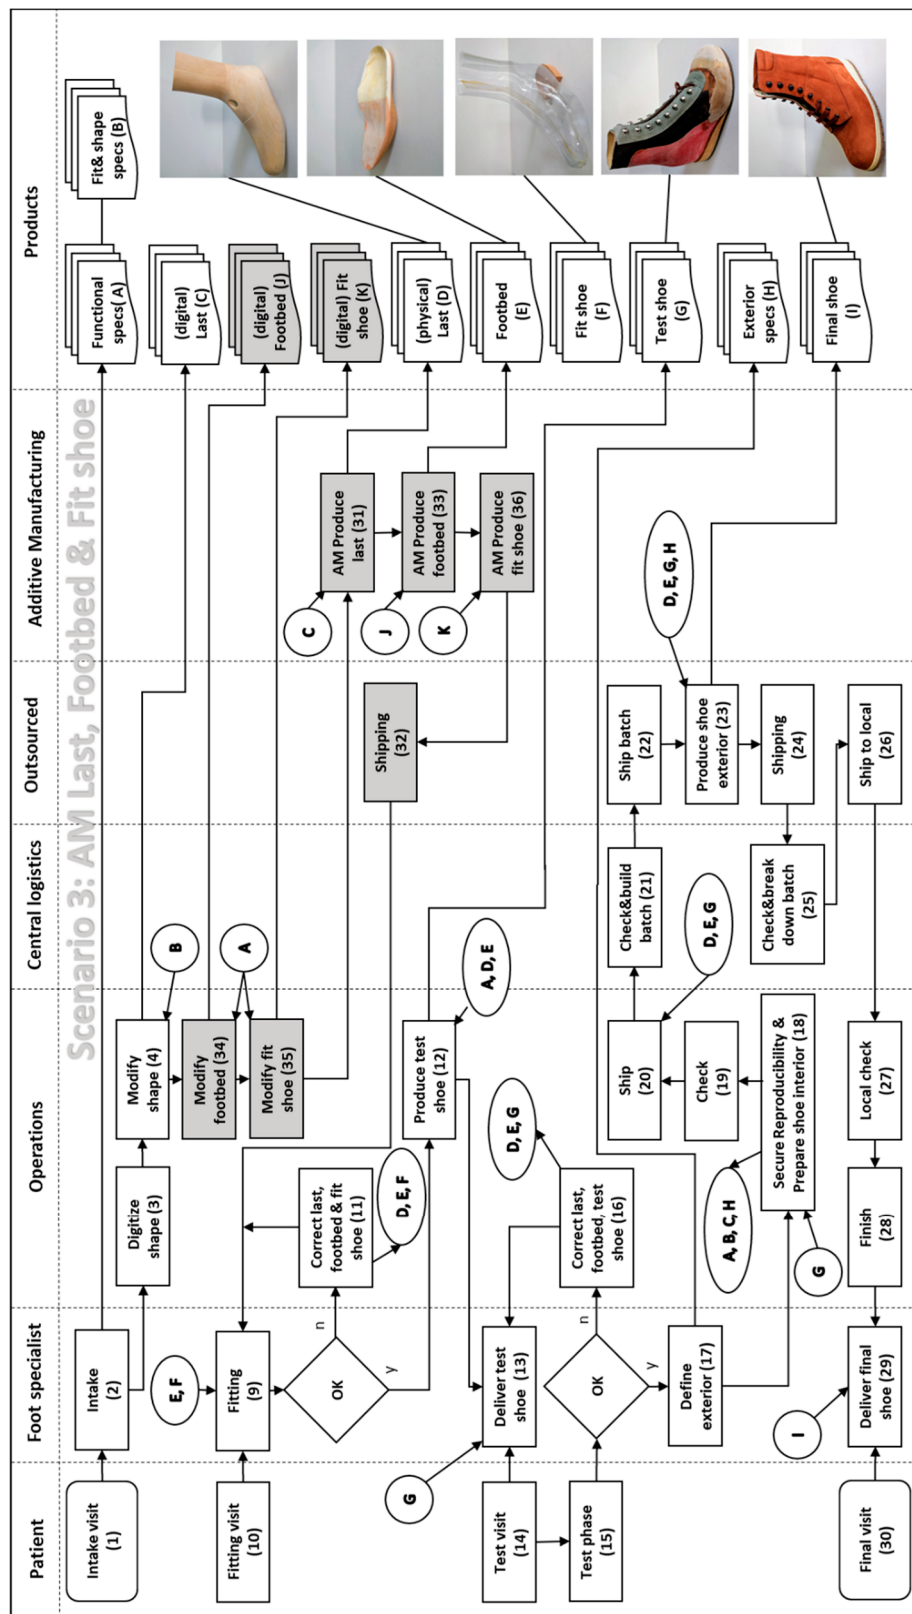

Figure S3. Scenario 3. AM of the fitting shoe.

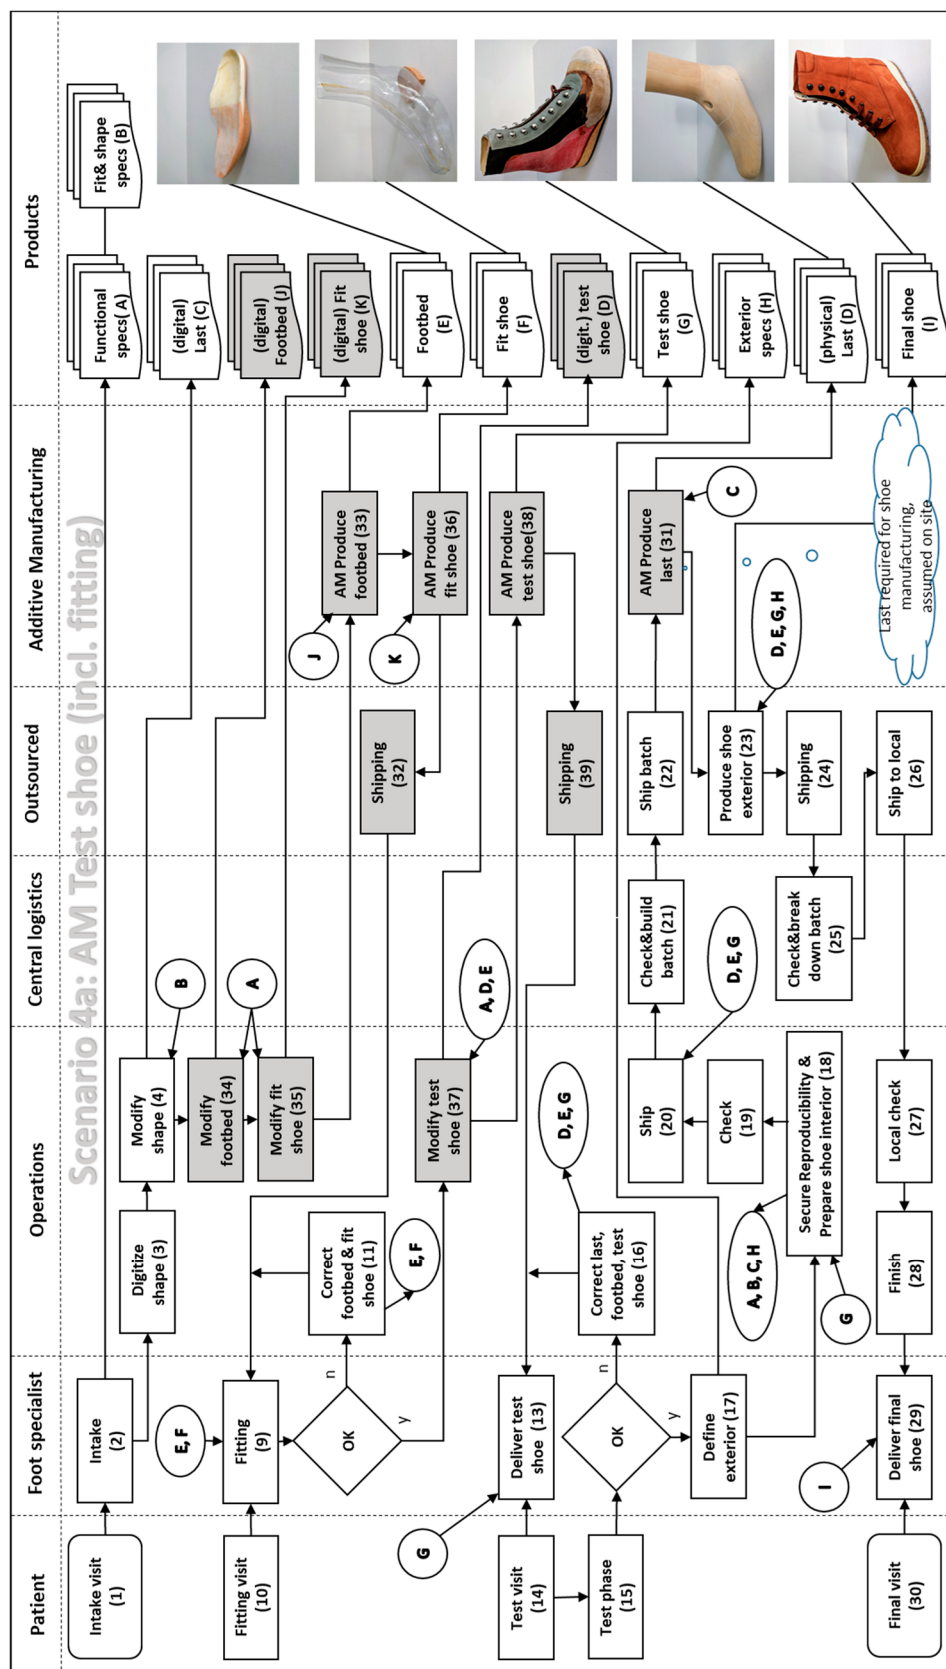

Figure S4. Process flow Scenario 4a. AM of the test shoe (including fitting process).

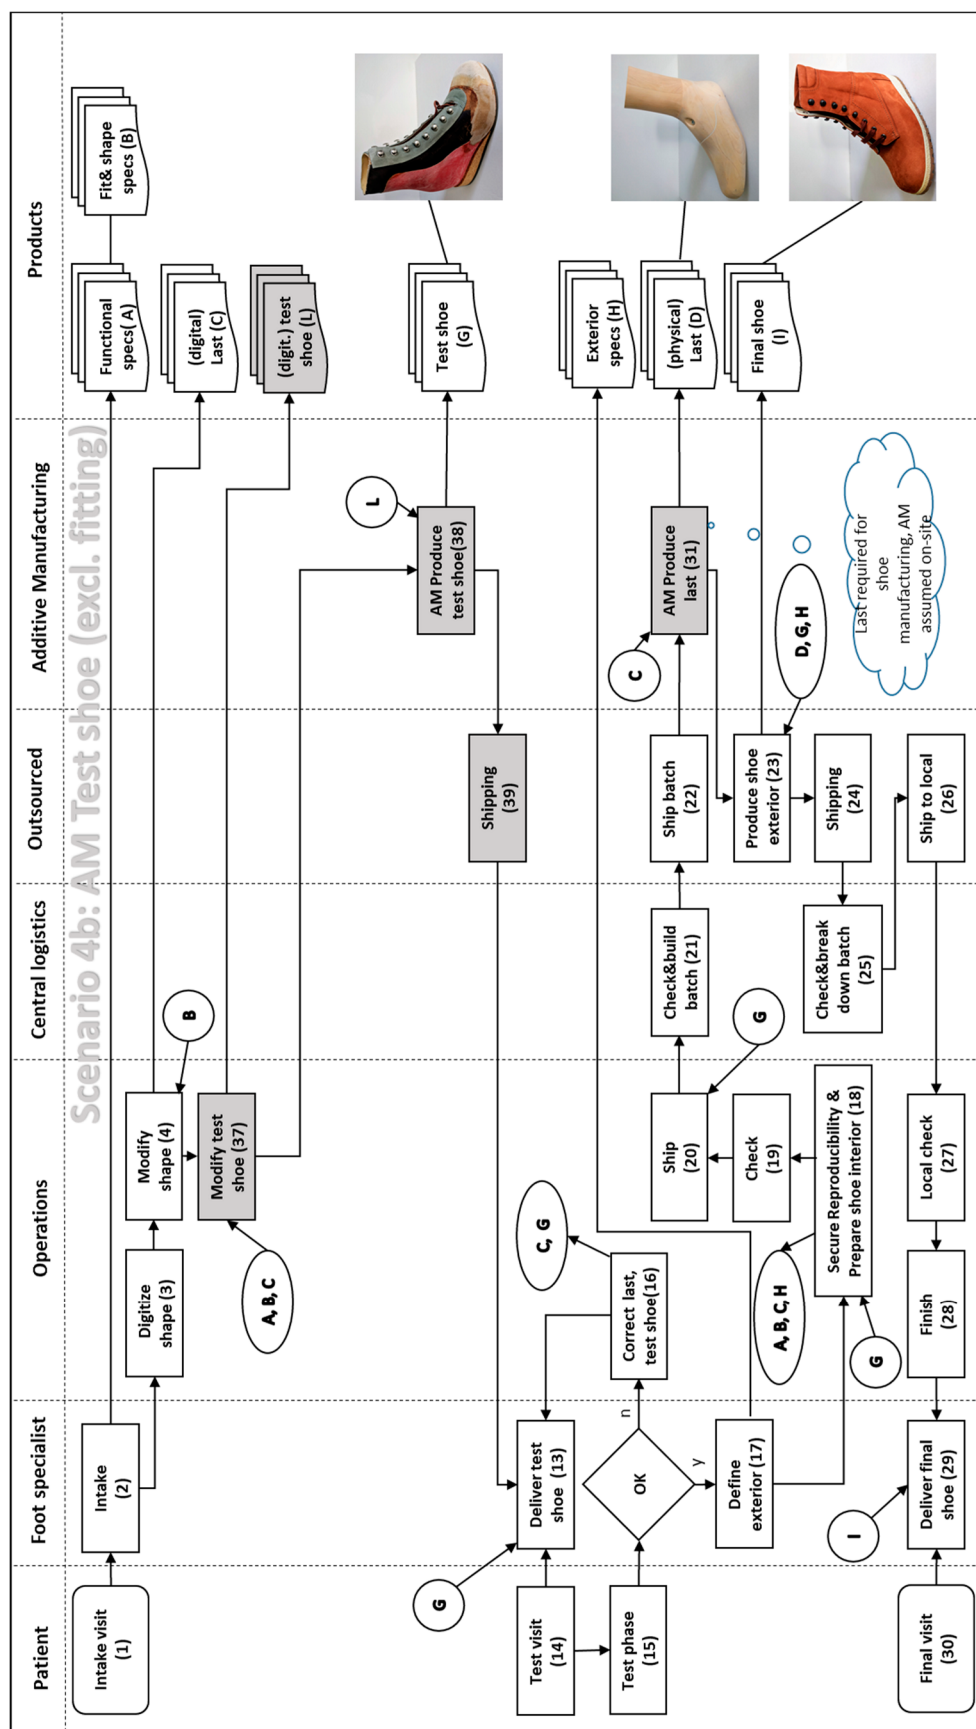

Figure S5. Process flow Scenario 4b. AM of the test shoe (excluding fitting process).

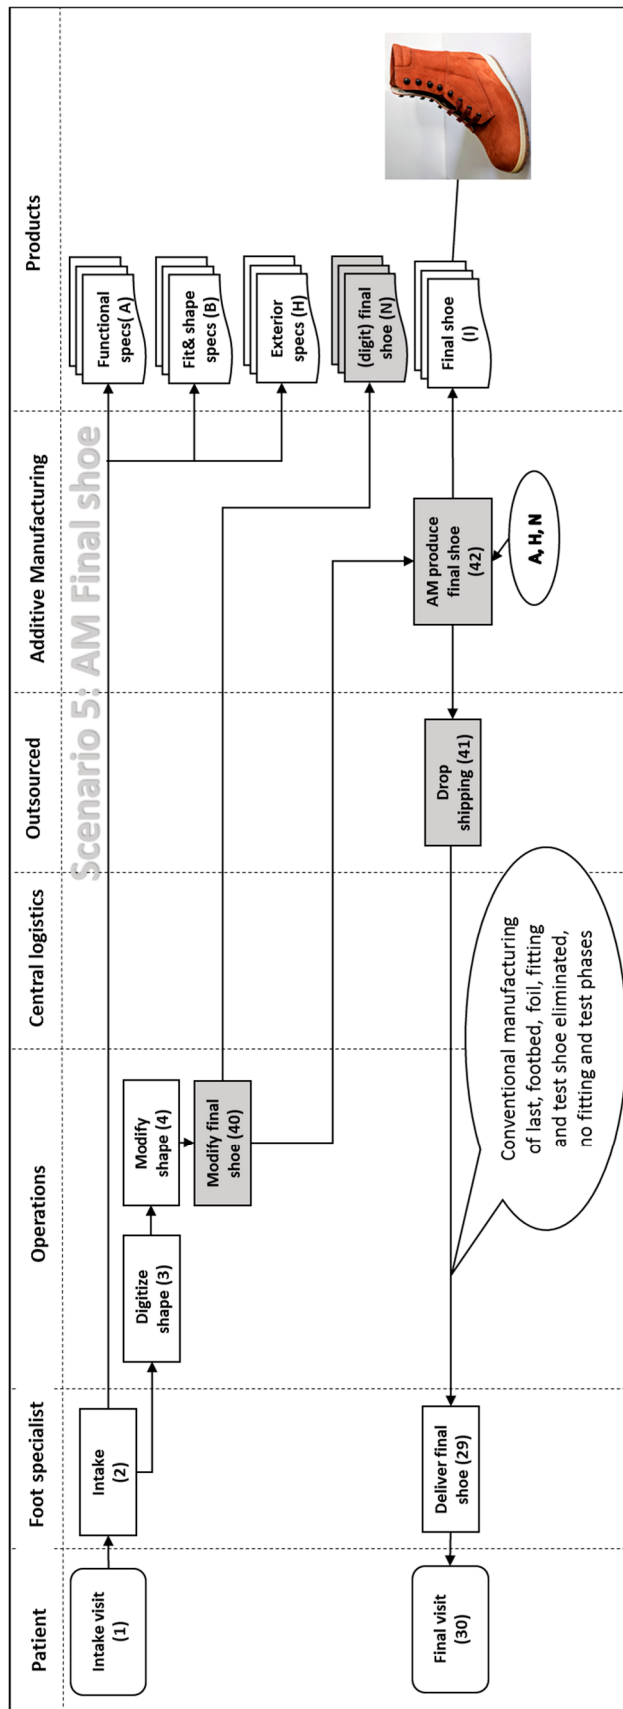

Figure S6. Process flow Scenario 5. AM of the final shoe.

| <i>Description</i>                   | <i>Relevant scenarios</i> | <i>Year</i> | <i>AM Technical feasibility score (7-point Likert scale)</i> |                        |                          |                                        |                            |                          |                              |
|--------------------------------------|---------------------------|-------------|--------------------------------------------------------------|------------------------|--------------------------|----------------------------------------|----------------------------|--------------------------|------------------------------|
|                                      |                           |             | <i>Definitely possible</i>                                   | <i>Likely possible</i> | <i>Probably possible</i> | <i>Neither possible nor impossible</i> | <i>Probably impossible</i> | <i>Likely impossible</i> | <i>Definitely impossible</i> |
| <i>AM Production of last</i>         | <i>1, 2, 3, 4a, 4b</i>    | <i>2020</i> | *                                                            |                        |                          |                                        |                            |                          |                              |
|                                      |                           | <i>2025</i> | *                                                            |                        |                          |                                        |                            |                          |                              |
|                                      |                           | <i>2030</i> | *                                                            |                        |                          |                                        |                            |                          |                              |
| <i>AM Production of foot bed</i>     | <i>2, 3, 4a</i>           | <i>2020</i> |                                                              | *                      |                          |                                        |                            |                          |                              |
|                                      |                           | <i>2025</i> | *                                                            |                        |                          |                                        |                            |                          |                              |
|                                      |                           | <i>2030</i> | *                                                            |                        |                          |                                        |                            |                          |                              |
| <i>AM Production of fitting shoe</i> | <i>3, 4a</i>              | <i>2020</i> |                                                              | *                      |                          |                                        |                            |                          |                              |
|                                      |                           | <i>2025</i> | *                                                            |                        |                          |                                        |                            |                          |                              |
|                                      |                           | <i>2030</i> | *                                                            |                        |                          |                                        |                            |                          |                              |
| <i>AM Production of test shoe</i>    | <i>4a, 4b</i>             | <i>2020</i> |                                                              |                        |                          |                                        |                            | *                        |                              |
|                                      |                           | <i>2025</i> |                                                              |                        | *                        |                                        |                            |                          |                              |
|                                      |                           | <i>2030</i> | *                                                            |                        |                          |                                        |                            |                          |                              |
| <i>AM Produce final shoe</i>         | <i>5</i>                  | <i>2020</i> |                                                              |                        |                          |                                        |                            |                          | *                            |
|                                      |                           | <i>2025</i> |                                                              |                        |                          | *                                      |                            |                          |                              |
|                                      |                           | <i>2030</i> | *                                                            |                        |                          |                                        |                            |                          |                              |

Table S1. AM feasibility.

| <i>Relevant scenarios</i> | <i>Description</i>                   | <i>2020</i>   | <i>2025</i>  | <i>2030</i>  | <i>2035</i> |
|---------------------------|--------------------------------------|---------------|--------------|--------------|-------------|
| <i>1, 2, 3, 4a, 4b</i>    | <i>AM Production of last</i>         | <i>150.00</i> | <i>90</i>    | <i>75</i>    | <i>75</i>   |
| <i>2, 3, 4a</i>           | <i>AM Production of foot bed</i>     | <i>75.00</i>  | <i>55.0</i>  | <i>50.0</i>  | <i>45</i>   |
| <i>3, 4a</i>              | <i>AM Production of fitting shoe</i> | <i>200.00</i> | <i>150.0</i> | <i>100.0</i> | <i>100</i>  |
| <i>4a, 4b</i>             | <i>AM Production of test shoe</i>    |               | <i>375.0</i> | <i>250.0</i> | <i>250</i>  |
| <i>5</i>                  | <i>AM Produces final shoe</i>        |               | <i>750</i>   | <i>500</i>   | <i>500</i>  |

Table S2. Cost estimates AM components in €.

|                               |                           |             | <i>Digital design feasibility score (7-point Likert scale)</i> |                        |                          |                                        |                            |                          |                              |
|-------------------------------|---------------------------|-------------|----------------------------------------------------------------|------------------------|--------------------------|----------------------------------------|----------------------------|--------------------------|------------------------------|
| <i>Description</i>            | <i>Relevant scenarios</i> | <i>Year</i> | <i>Definitely possible</i>                                     | <i>Likely possible</i> | <i>Probably possible</i> | <i>Neither possible nor impossible</i> | <i>Probably impossible</i> | <i>Likely impossible</i> | <i>Definitely impossible</i> |
| <i>Digital last</i>           | <i>1, 2, 3, 4a, 4b</i>    | <i>2020</i> |                                                                | *                      | *                        |                                        |                            |                          |                              |
|                               |                           | <i>2025</i> | *                                                              | *                      |                          |                                        |                            |                          |                              |
|                               |                           | <i>2030</i> | **                                                             |                        |                          |                                        |                            |                          |                              |
| <i>Digital foot bed</i>       | <i>2, 3, 4a</i>           | <i>2020</i> |                                                                | *                      | *                        |                                        |                            |                          |                              |
|                               |                           | <i>2025</i> | **                                                             |                        |                          |                                        |                            |                          |                              |
|                               |                           | <i>2030</i> | **                                                             |                        |                          |                                        |                            |                          |                              |
| <i>Digital fitting shoe</i>   | <i>3, 4a</i>              | <i>2020</i> |                                                                | *                      | *                        |                                        |                            |                          |                              |
|                               |                           | <i>2025</i> | *                                                              | *                      |                          |                                        |                            |                          |                              |
|                               |                           | <i>2030</i> | **                                                             |                        |                          |                                        |                            |                          |                              |
| <i>Digital test shoe</i>      | <i>4a, 4b</i>             | <i>2020</i> |                                                                | *                      | *                        |                                        |                            |                          |                              |
|                               |                           | <i>2025</i> | *                                                              | *                      |                          |                                        |                            |                          |                              |
|                               |                           | <i>2030</i> | **                                                             |                        |                          |                                        |                            |                          |                              |
| <i>AM Produces final shoe</i> | <i>5</i>                  | <i>2020</i> |                                                                | *                      | *                        |                                        |                            |                          |                              |
|                               |                           | <i>2025</i> | *                                                              | *                      |                          |                                        |                            |                          |                              |
|                               |                           | <i>2030</i> | **                                                             |                        |                          |                                        |                            |                          |                              |

Table S3. Digital design feasibility, \* represents one expert opinion each.

| COSTS                                                                           |        |          |                       |                                                                                                                                             |
|---------------------------------------------------------------------------------|--------|----------|-----------------------|---------------------------------------------------------------------------------------------------------------------------------------------|
| Description                                                                     | Amount | unit     | Related process steps | Explanation                                                                                                                                 |
| <b>Equipment</b>                                                                |        |          |                       |                                                                                                                                             |
| available hours/year for equipment = 40h/week * 50 available weeks/year = 2000h | 2000   | h        |                       |                                                                                                                                             |
| Tablet, cell phone, orthomedic software                                         | 2,07   | €/h      | 2, 9, 13, 29          | Orthomedic software 270€/month/practitioner; tablet/cell phone 2700€/3 years                                                                |
| Scanner                                                                         | 7500   | €/y      | 3                     | 3 locations, 10k€/4y; Scanner is only used for this purpose : cost calculated on order volume (not hourly rate)                             |
| PC                                                                              | 0,25   | €/h      | 4                     | 2k€/4y                                                                                                                                      |
| Rhino/Lutracad software                                                         | 11880  | €/y      | 4                     | 3 locations, 3k€/license/y; plus software 80€/month; software only used for this purpose: cost calculated on order volume (not hourly rate) |
| PC & software                                                                   | 0,97   | €/y      | 19,21,25,27           | PC= 2k€/4y software = 120€/month                                                                                                            |
| New, smart design software                                                      | 10000  | €/y      | 34                    | Assumption to be verified; SW only used for this purpose: cost calculated on orders volume                                                  |
| Grinding machine                                                                | 1      | €/h      | 7, 11, 12             | 20k€/10y                                                                                                                                    |
| Press                                                                           | 0,20   | €/h      | 7, 12                 | 4k€/10y                                                                                                                                     |
| Oven                                                                            | 1,00   | €/h      | 7, 12                 | 10k€/5y                                                                                                                                     |
| Vacuterm                                                                        | 0,5    | €/h      | 8                     | 10k€/10y                                                                                                                                    |
| <b>Facility</b>                                                                 |        |          |                       |                                                                                                                                             |
| available hours/year for facilities= 40h/week * 50 available weeks/year = 2000h | 2000   | h        |                       |                                                                                                                                             |
| Facility cost operations                                                        | 190    | €/m 2/y  |                       | Rental, includes heating, lighting, basic interior (work benches); includes warehouse, offices, factory                                     |
| Facility cost operations                                                        | 0,10   | €/m 2/h  |                       |                                                                                                                                             |
| Facility cost treatment rooms                                                   | 260    | €/m 2/y  |                       | based on 65% utilization rate                                                                                                               |
| Facility cost treatment rooms                                                   | 0,13   | €/m 2/h  |                       |                                                                                                                                             |
| Treatment room                                                                  | 20     | m2       |                       |                                                                                                                                             |
| Scan room                                                                       | 16     | m2       |                       |                                                                                                                                             |
| Operational cell                                                                | 30     | m2       |                       | includes grinding, press, oven, vacuterm, work bench                                                                                        |
| Logistics operations                                                            | 16     | m2       | 21, 25                |                                                                                                                                             |
| <b>Human Resources</b>                                                          |        |          |                       |                                                                                                                                             |
| Foot specialist                                                                 | 55     | €/h      |                       | based on 1200h/year effectively                                                                                                             |
| Junior operator                                                                 | 25     | €/h      |                       | based on 1200h/year effectively                                                                                                             |
| Senior operator                                                                 | 37     | €/h      |                       | based on 1200h/year effectively                                                                                                             |
| <b>Material</b>                                                                 |        |          |                       |                                                                                                                                             |
| Cast                                                                            | 15     | €/or der | 2                     |                                                                                                                                             |
| footbed                                                                         | 12     | €/or der | 7                     |                                                                                                                                             |
| Foil                                                                            | 8      | €/or der | 8                     |                                                                                                                                             |
| Correction                                                                      | 5      | €/or der | 11                    |                                                                                                                                             |
| Test shoe - with functional provision                                           | 40     | €/or der | 12                    |                                                                                                                                             |
| Test shoe - without functional provision                                        | 20     | €/or der | 12                    |                                                                                                                                             |
| <b>Outsourced</b>                                                               |        |          |                       |                                                                                                                                             |
| Last manufacturing                                                              | 90     | €/or der | 5                     |                                                                                                                                             |

|                                                                                                                                                                 |               |             |                                  |                                                 |
|-----------------------------------------------------------------------------------------------------------------------------------------------------------------|---------------|-------------|----------------------------------|-------------------------------------------------|
| Ship last to local                                                                                                                                              | 10            | €/or<br>der | 6                                |                                                 |
| Ship local to central vv                                                                                                                                        | 10            | €/or<br>der | 20                               |                                                 |
| Ship to external manufacturing                                                                                                                                  | 10            | €/or<br>der | 22                               | Ship in batches, cost per pair                  |
| Shoe exterior manufacturing                                                                                                                                     | 260           | €/or<br>der | 23                               | includes return shipping cost                   |
|                                                                                                                                                                 |               |             |                                  |                                                 |
| <b>TIME</b>                                                                                                                                                     |               |             |                                  |                                                 |
| <b>Description</b>                                                                                                                                              | <b>Amount</b> | <b>unit</b> | <b>Related process<br/>steps</b> | <b>Explanation</b>                              |
| Time calculation=(1/3*3.5h)+(2/3*1.5h)                                                                                                                          |               |             | 12                               |                                                 |
| Phillipines 15d/China 17d/Lituania 15d,<br>time includes shipping vv                                                                                            |               |             | 22, 23, 24                       |                                                 |
|                                                                                                                                                                 |               |             |                                  |                                                 |
| <b>VOLUME</b>                                                                                                                                                   |               |             |                                  |                                                 |
| <b>Description</b>                                                                                                                                              | <b>Amount</b> | <b>unit</b> | <b>Related process<br/>steps</b> | <b>Explanation</b>                              |
| Order volume                                                                                                                                                    | 1500          |             |                                  | One order consists of two (semi-finished) shoes |
| Amount of scan locations                                                                                                                                        | 3             |             |                                  |                                                 |
| % of orders cast                                                                                                                                                | 80 %          |             | 2                                |                                                 |
| Last, footbed, foil corrections                                                                                                                                 | 100 %         |             | 11                               |                                                 |
| Test shoe - with functional provision                                                                                                                           | 33 %          |             | 12                               |                                                 |
| Test shoe - without functional provision                                                                                                                        | 67 %          |             | 12                               |                                                 |
| Last, footbed, test shoe corrections                                                                                                                            | 50 %          |             | 16                               |                                                 |
| Ship from 4 locations, minus central.<br>Volume evenly spread over locations                                                                                    | 75 %          |             | 20                               |                                                 |
|                                                                                                                                                                 |               |             |                                  |                                                 |
| <b>OTHER</b>                                                                                                                                                    |               |             |                                  |                                                 |
| If a work cell (grinding/press/oven) is not<br>working on an order, it is available for<br>other orders outside.                                                |               |             |                                  |                                                 |
| If a work cell (grinding/press/oven) is<br>working on an order, it is not available for<br>other orders, the processing time of then<br>applies to all machines |               |             |                                  |                                                 |

Table S4. Assumptions for calculation.



|   |   |                                                |         |        |                                         |                  |                      |                 |                 |        |  |                                |            |        |
|---|---|------------------------------------------------|---------|--------|-----------------------------------------|------------------|----------------------|-----------------|-----------------|--------|--|--------------------------------|------------|--------|
| 1 | 5 | Test phase                                     | exclude |        |                                         |                  |                      |                 |                 |        |  |                                |            |        |
| 1 | 6 | Correct last, footbed, test shoe               | include | 0,33   |                                         | Operational cell | 0,48                 | Senior operator | 6,17            |        |  |                                |            | 6,64   |
| 1 | 7 | Define exterior                                | include | 0,50   |                                         | Treatment room   | 1,30                 | Foot specialist | 27,50           |        |  |                                |            | 28,80  |
| 1 | 8 | Secure reproducibility & prepare shoe interior | include | 0,25   |                                         | Operational cell | 0,71                 | Senior operator | 9,25            |        |  |                                |            | 9,96   |
| 1 | 9 | Check                                          | include | 0,08   | PC & software                           | 0,08             | Operational cell     | 0,24            | Senior operator | 3,08   |  |                                |            | 3,40   |
| 2 | 0 | Ship                                           | include | 24,00  |                                         |                  |                      |                 |                 |        |  | Ship local to central vv       | 7,5        | 7,50   |
| 2 | 1 | Check & build batch                            | include | 0,17   | PC & software                           | 0,16             | Logistics operations | 0,25            | Senior operator | 6,17   |  |                                |            | 6,58   |
| 2 | 2 | Ship batch                                     | include | 360,00 |                                         |                  |                      |                 |                 |        |  | Ship to external manufacturing | 10         | 10,00  |
| 2 | 3 | Produce shoe exterior                          | include |        |                                         |                  |                      |                 |                 |        |  | Shoe exterior manufacturing    | 260        | 260,00 |
| 2 | 4 | Shipping                                       | include |        |                                         |                  |                      |                 |                 |        |  |                                |            |        |
| 2 | 5 | Check & break down batch                       | include | 0,08   | PC & software                           | 0,08             | Logistics operations | 0,13            | Senior operator | 3,08   |  |                                |            | 3,29   |
| 2 | 6 | Ship to local                                  | include | 24,00  |                                         |                  |                      |                 |                 |        |  | Ship local to central vv       | 7,5        | 7,50   |
| 2 | 7 | Check                                          | include | 0,08   | PC & software                           | 0,08             | Operational cell     | 0,24            | Senior operator | 3,08   |  |                                |            | 3,40   |
| 2 | 8 | Finish                                         | include | 0,33   |                                         |                  | Operational cell     | 0,95            | Junior operator | 8,33   |  |                                |            | 9,28   |
| 2 | 9 | Deliver final shoe                             | include | 0,50   | Tablet, cell phone, orthomedic software | 1,04             | Treatment room       | 1,30            | Foot specialist | 27,50  |  |                                |            | 29,84  |
| 3 | 0 | Final visit                                    | exclude |        |                                         |                  |                      |                 |                 |        |  |                                |            |        |
|   |   |                                                | Sum     | 465,58 |                                         | 26,91            |                      | 24,95           |                 | 402,19 |  | 69,02                          | Outsourced | 350,00 |
|   |   |                                                |         |        |                                         |                  |                      |                 |                 |        |  | Transportation                 | 35,00      |        |
|   |   |                                                |         |        |                                         |                  |                      |                 |                 |        |  | AM                             | 0,00       |        |
|   |   |                                                |         |        |                                         |                  |                      |                 |                 |        |  | Sum                            |            | 908,06 |

Table S5. Calculations for Scenario 0.

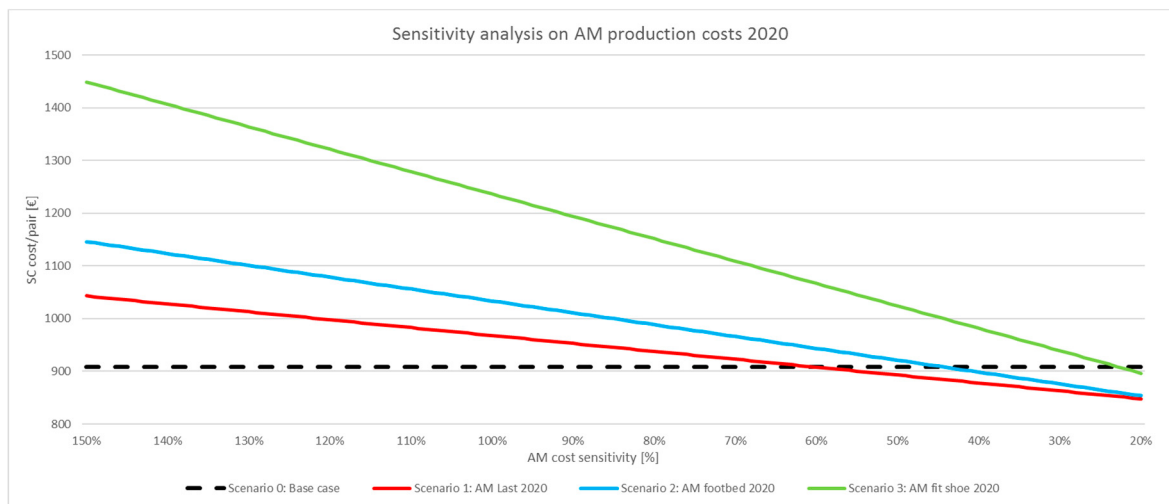

Figure S7. Effect of AM cost on total SC costs (2020).

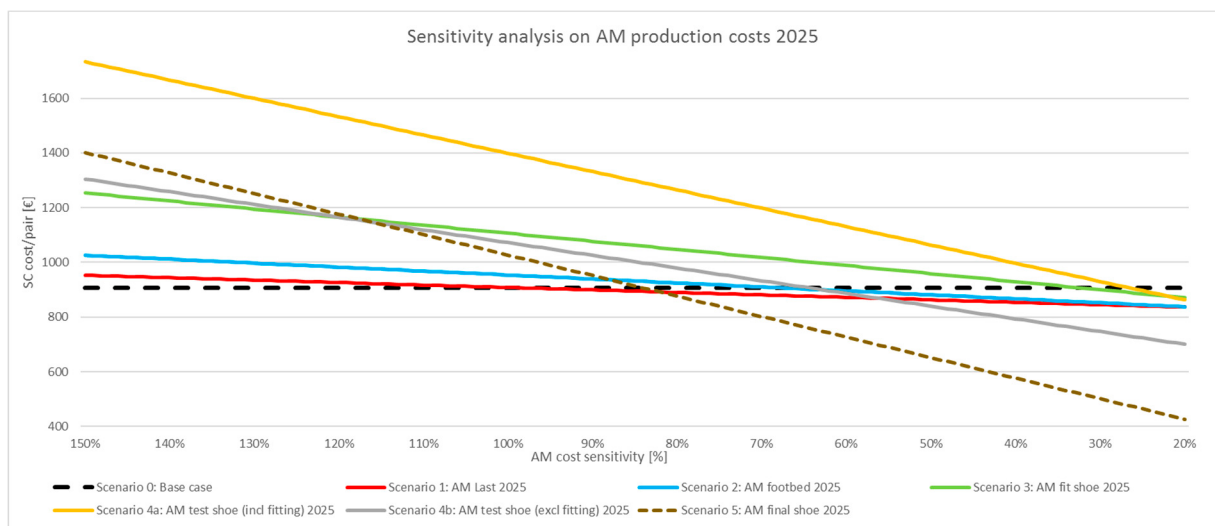

Figure S8. Effect of AM cost on total SC costs (2025).

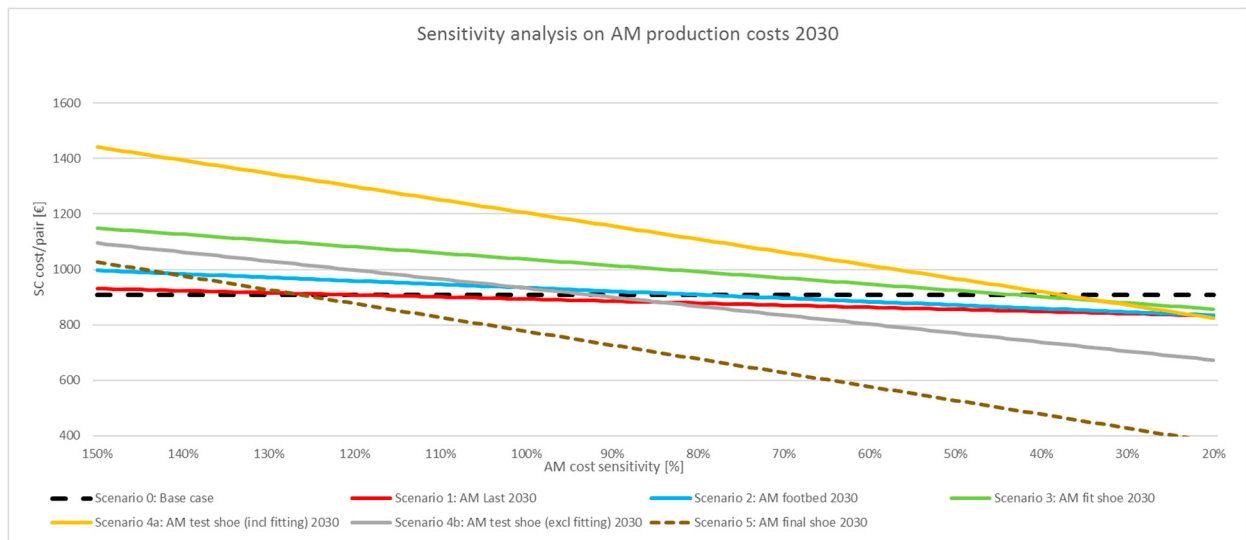

Figure S9. Effect of AM cost on total SC costs (2030).
